# Supplementary material for: Comparative Evaluation of Three TSPO PET Radiotracers in a LPS-Induced Model of Mild Neuroinflammation in Rats
Source: PubMed Central journal article supplement (PMC5209405; doi:10.1007/s11307-016-0984-3), 2016-08-01
Supplement: 11307_2016_984_MOESM1_ESM.pdf [file 11307_2016_984_MOESM1_ESM.pdf]

## Electronic Supplementary Material

### Comparative evaluation of three TSPO PET radiotracers in a LPS-induced model of mild neuroinflammation in rats

**Journal: Molecular Imaging and Biology**

Sujata Sridharan<sup>1</sup>, Francois-Xavier Lepelletier<sup>1</sup>, William Trigg<sup>2</sup>, Samuel Banister<sup>3</sup>, Tristan Reekie<sup>3</sup>, Michael Kassiou<sup>3,4</sup>, Alexander Gerhard<sup>1</sup>, Rainer Hinz<sup>1</sup>, Hervé Boutin<sup>1\*</sup>

<sup>1</sup> Wolfson Molecular Imaging Centre, University of Manchester, Manchester, UK.

<sup>2</sup> GE Healthcare, The Grove Centre, Amersham, Buckinghamshire, UK.

<sup>3</sup> School of Chemistry, University of Sydney, NSW 2006 Australia.

<sup>4</sup> Faculty of Health Sciences, University of Sydney, NSW 2006 Australia.

\* Corresponding author: Wolfson Molecular Imaging Centre, University of Manchester, 27 Palatine Road, Manchester, M20 3LJ, UK.

Email: [herve.boutin@manchester.ac.uk](mailto:herve.boutin@manchester.ac.uk)

**Supplementary Table 1.** Summary of injected doses, specific activities and injected amounts for each tracer (mean±SD).

| Group | tracer                                                  | Injected dose (MBq) | Specific activity at injection (GBq/μmol) |              | Injected amount (nmol) |           |
|-------|---------------------------------------------------------|---------------------|-------------------------------------------|--------------|------------------------|-----------|
|       |                                                         |                     | Mean                                      | Range        | Mean                   | Range     |
| 1     | [ <sup>11</sup> C]-(R)-PK11195( <sup>18</sup> F)GE-180  | 32.79±11.69         | 165.43±106.28                             | 61.53-304.59 | 0.27±0.16              | 0.11-0.53 |
|       | [ <sup>18</sup> F]GE-180                                | 29.26±5.35          | 149.92±98.13                              | 68.58-344.13 | 0.24±0.10              | 0.09-0.35 |
| 2     | [ <sup>11</sup> C]-(R)-PK11195( <sup>18</sup> F)DPA-714 | 33.96±6.20          | 113.95±66.7                               | 2.84-192.04  | 1.70±3.48              | 0.18-8.80 |
|       | [ <sup>18</sup> F]DPA-714                               | 29.26±9.25          | 102.94±80.66                              | 25.93-213.91 | 0.45±0.37              | 0.18-1.14 |
| 3     | [ <sup>18</sup> F]GE-180 <sub>only</sub>                | 32.37±6.40          | 132.45±99.42                              | 64.07-300.38 | 0.35±0.20              | 0.10-0.57 |
| 4     | [ <sup>18</sup> F]DPA-714 <sub>only</sub>               | 34.77±6.91          | 58.57±40.98                               | 13.41-109.53 | 1.00±0.82              | 0.34-2.22 |

**Supplementary Table 2.** Primary and secondary antibodies used for immunohistochemistry

| Staining  | Primary antibody, source (concentration)                        | Secondary antibody (concentration)           |
|-----------|-----------------------------------------------------------------|----------------------------------------------|
| CD11b     | Mouse anti-rat, AbD Serotec (1:1000)<br>Ref. Z0334              | AlexaFluor® 594nm donkey anti-mouse (1:500)  |
| GFAP      | Rabbit anti-cow, Dako (1:400)<br>Ref. MCA275G                   | AlexaFluor® 488nm donkey anti-rabbit (1:500) |
| NeuN      | Mouse anti-mouse, Chemicon (1:1000)<br>Ref. MAB377              | AlexaFluor® 594nm donkey anti-mouse (1:500)  |
| Claudin-5 | Rabbit anti-Claudin-5, Sigma-Aldrich (1:100)<br>Ref. SAB4502981 | AlexaFluor® 488nm donkey anti-rabbit (1:500) |

**Group 1**  
Animals scanned twice;  
Paired comparisons  
 $[^{11}\text{C}]-(\text{R})\text{-PK11195}_{[^{18}\text{F}]\text{GE-180}}$   
n=6  
 $[^{18}\text{F}]\text{GE-180}$

+

**Group 3**  
Animals scanned with  $[^{18}\text{F}]\text{GE-180}_{\text{only}}$   
n=5

**Group 2**  
Animals scanned twice;  
Paired comparisons  
 $[^{11}\text{C}]-(\text{R})\text{-PK11195}_{[^{18}\text{F}]\text{DPA-714}}$   
 $[^{18}\text{F}]\text{DPA-714}$  n=6

+

**Group 4**  
Animals scanned with  $[^{18}\text{F}]\text{DPA-714}_{\text{only}}$   
n=5

**Supplementary Figure 1:** Distribution of animal numbers per tracer and scanning group. Animals were dual-scanned with (R)- $[^{11}\text{C}]\text{PK11195}$  (n = 6) in the morning and  $[^{18}\text{F}]\text{GE-180}$  (n = 6) in the afternoon or (R)- $[^{11}\text{C}]\text{PK11195}$  (n = 6) in the morning and  $[^{18}\text{F}]\text{DPA-714}$  (n = 6) in the afternoon. A further n=5 animals each were scanned with  $[^{18}\text{F}]\text{GE-180}$  or  $[^{18}\text{F}]\text{DPA-714}$  only.

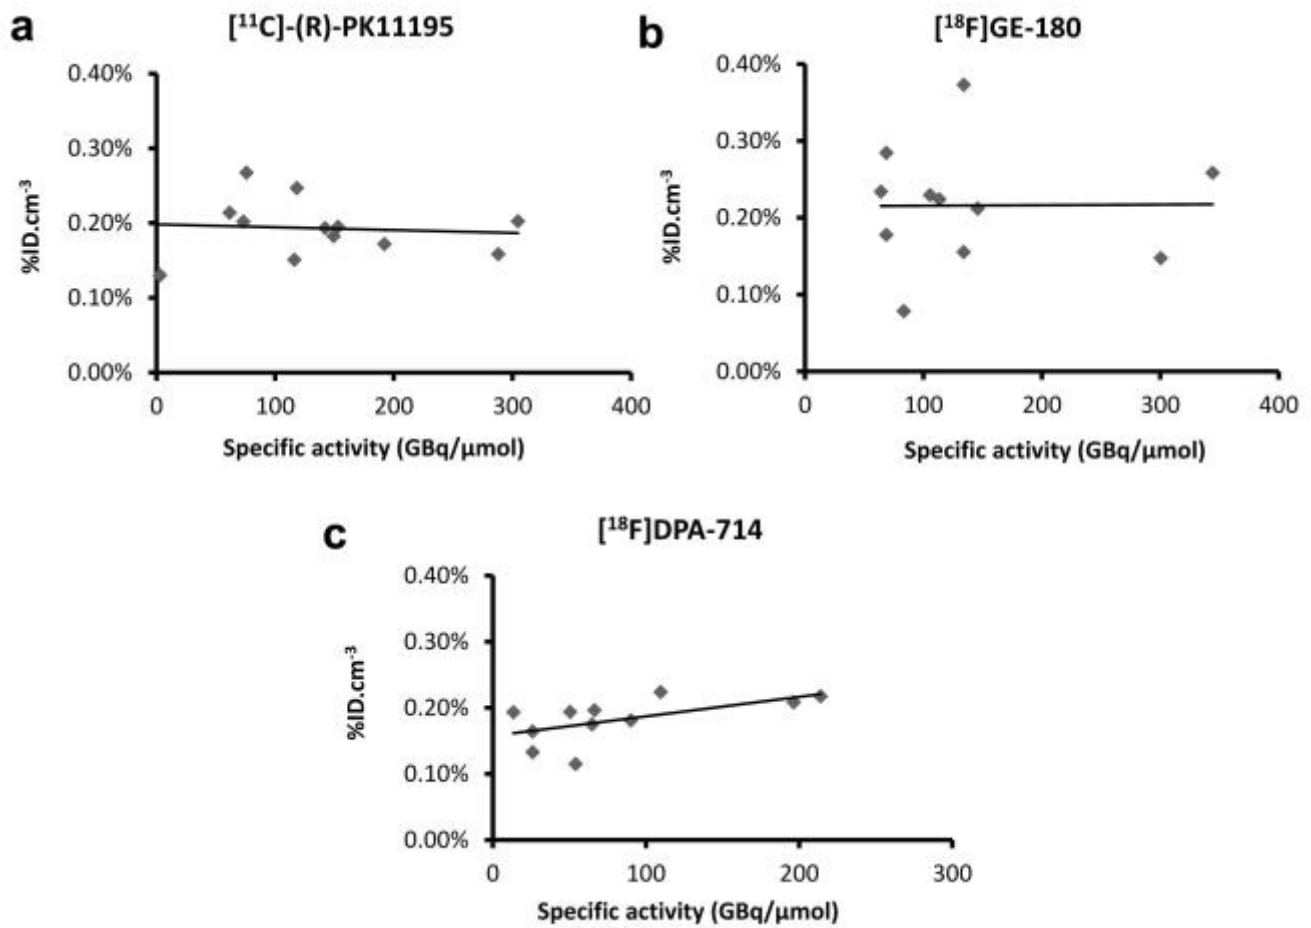

**Supplementary Figure 2:** Specific activity at injection time vs. % injected dose per cubic centimetre in the core of the LPS injection site for (a) (R)- $[^{11}\text{C}]\text{PK11195}$ , (b)  $[^{18}\text{F}]\text{GE-180}$  and (c)  $[^{18}\text{F}]\text{DPA-714}$ .  $r^2$  values were, respectively, 0.01, 0.00 and 0.34; showing no relationship between the injected specific activity of each tracer and the corresponding uptake in the core of the LPS site.

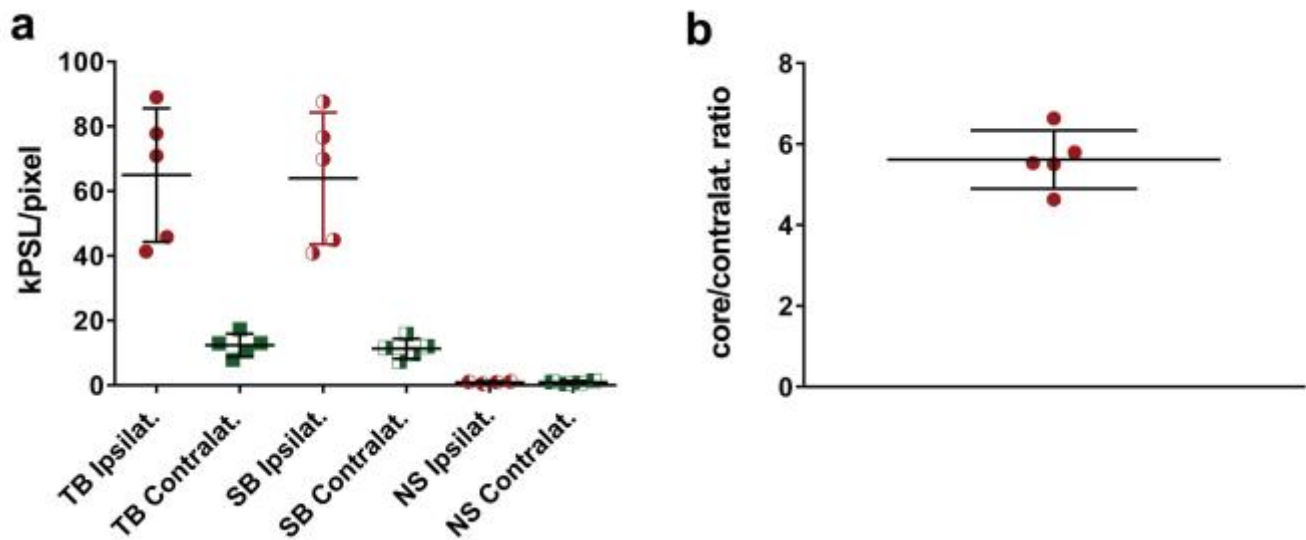

**Supplementary Figure 3:** (a) Quantification of the [ $^{18}\text{F}$ ]DPA-714 autoradiography (TB: total binding (5nM [ $^{18}\text{F}$ ]DPA-714), SB: specific binding, NS: non-specific binding access by co-incubation of 5nM of [ $^{18}\text{F}$ ]DPA-714 with 5 $\mu\text{M}$  of PK11195) in the ipsilateral and contralateral striatum of rats 3 days after injection of 1 $\mu\text{g}$  of LPS in the right striatum and (b) core/contralateral ratio of the specific binding. Data are expressed as mean $\pm$ SD of kPSL/pixel.
